# Supplementary material for: Tumor Deposits and Perineural Invasion had Comparable Impacts on the Survival of Patients With Non-metastatic Colorectal Adenocarcinoma: A Population-Based Propensity Score Matching and Competing Risk Analysis
Source: PubMed Central journal article supplement — Cancer Control. 2022 Feb 14;29:10732748211051533. doi: 10.1177/10732748211051533 (PMC8848074; doi:10.1177/10732748211051533), 2022-02-14
Supplement: sj-pdf-1-ccx-10.1177_10732748211051533.pdf [file sj-pdf-1-ccx-10.1177_10732748211051533.pdf]

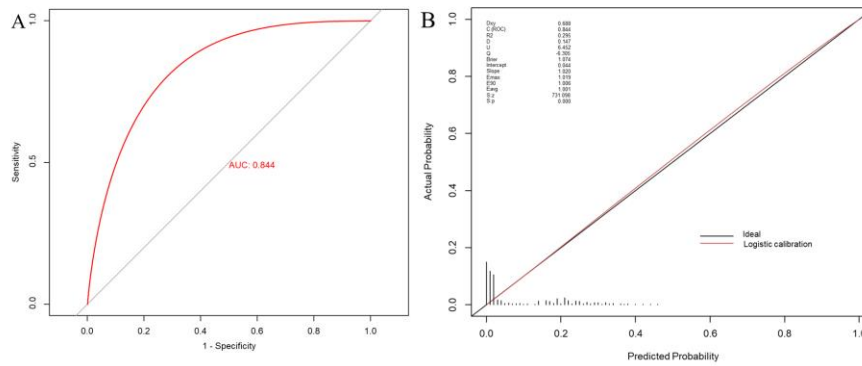

FIGURE S1 | ROC curve and calibration curve for TD in the external validation cohort

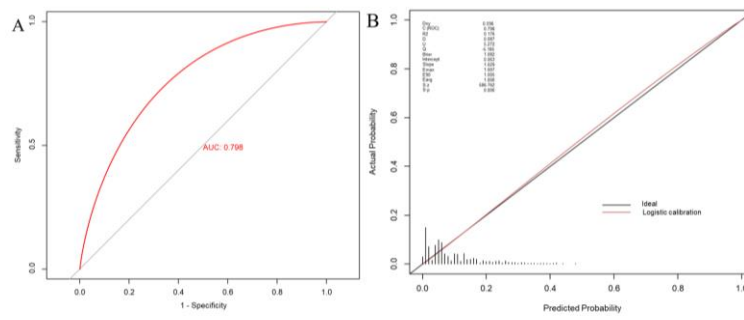

FIGURE S2 | ROC curve and calibration curve for PNI in the external validation cohort

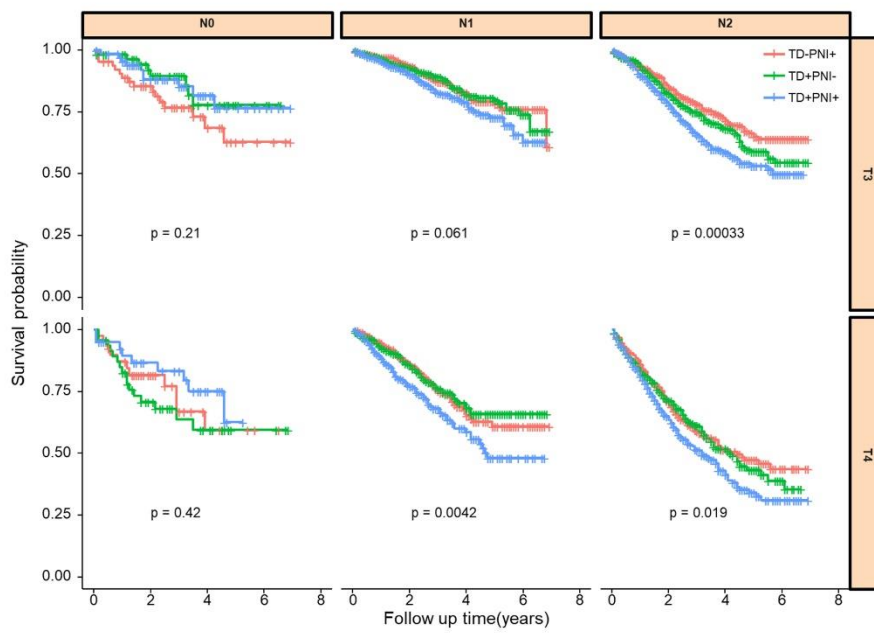

FIGURE S3 | Cancer-specific survival for patients with different TD and PNI status, in different T and N stage group.
